# Supplementary material for: Online Cost-Effectiveness ANalysis (OCEAN): a user-friendly interface to conduct cost-effectiveness analyses for cervical cancer
Source: Springer Nature journal article supplement (doi:10.1186/s12911-020-01232-9), 2020-09-04
Supplement: MOESM1 [file 18349486]

## **SUPPLEMENTARY MATERIAL**

Accompanying the manuscript:

**Online Cost-Effectiveness ANalysis (OCEAN): A user-friendly interface to conduct cost-effectiveness analyses**

The Online Cost-Effectiveness ANalysis (OCEAN) tool is available from <https://iconcologia.shinyapps.io/HECR-OCEAN>. A video tutorial illustrating its usage is available from the same web address.

### Underlying model

The OCEAN tool is based on a discrete-time, stochastic Markov chain model that simulates the natural history of HPV infection and cervical cancer was constructed. The basic model consists of 12 mutually exclusive and collectively exhaustive health states (a diagram is available as supplementary material, Figure S1) [healthy, HPV infection, CIN1-3 lesions, International Federation of Gynaecology and Obstetrics (FIGO) cervical cancer stages, cancer survival, cervical cancer death, and death from other causes]. Death states (both from cervical cancer and other causes) reflect country-specific female mortality stratified by age. This closed model follows a single cohort of 11-year-old girls until they reach the age of 85 years or death using equal 1-year increments, where every woman has her own probability of progressing, regressing, or remaining at the same health state. All women start model simulations as healthy and can move to the HPV-infected state by acquiring the infection with certain probability. If a woman shows clearance of the infection, she will regress to the healthy state and then, reinfection is possible. If the infection persists, the woman will move into the CIN1 state and may then progress to CIN2 and later to CIN3 and cancer or can regress and show clearance of the infection. Once in the cancer state, a woman may not regress to other health states, and instead progresses through the four stages of cancer according to the FIGO classification. A woman may die from cervical cancer if she belongs to the cancer stages or may die at any time from other non-cervical cancer cause. Nonetheless, every woman has a certain probability of developing symptoms and receiving treatment. After treatment, a woman can return to the healthy state -if she belonged to one of the CIN2-3 states- or go to the cancer survival state -if she belonged to one of the FIGO states.

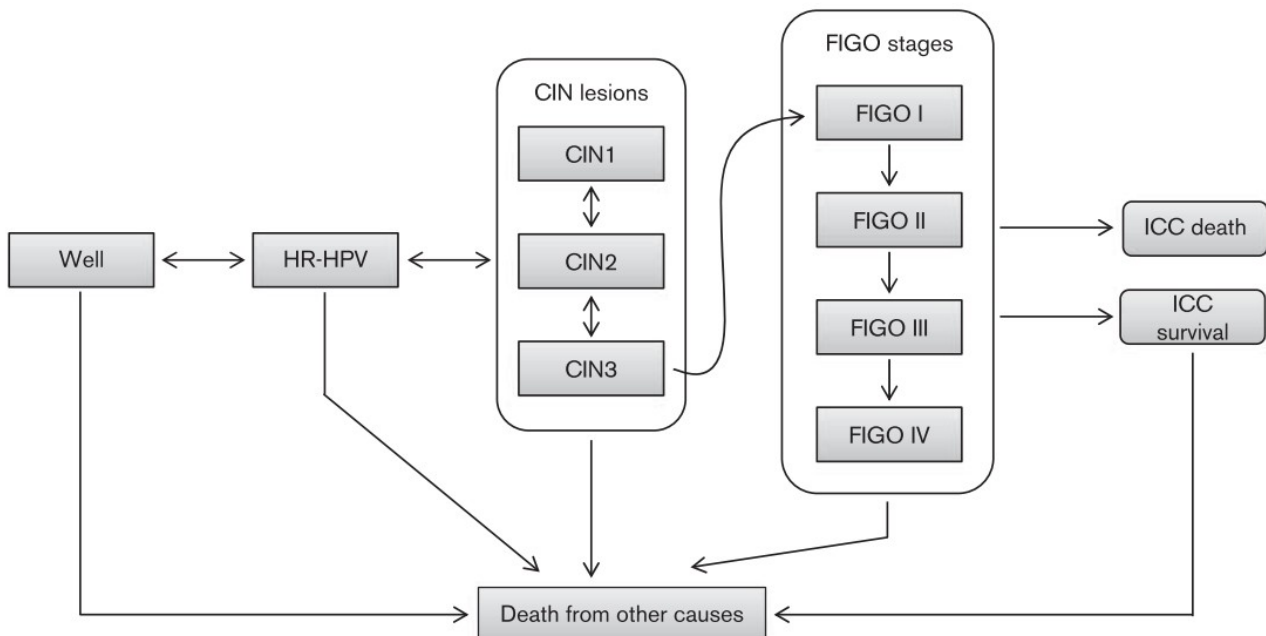

Figure S1. Diagram of the Markov model that reproduces the natural history of cervical cancer.

| Age group | HPV prevalence |
|-----------|----------------|
| 10-14     | 0.0000         |
| 15-19     | 0.2229         |
| 20-24     | 0.2307         |
| 25-29     | 0.1783         |
| 30-34     | 0.1250         |
| 35-39     | 0.0764         |
| 40-44     | 0.0671         |
| 45-49     | 0.0519         |
| 50-54     | 0.0663         |
| 55-59     | 0.0471         |
| 60-64     | 0.0348         |
| 65-69     | 0.0000         |
| 70-74     | 0.0000         |
| 75-79     | 0.0000         |
| 80-84     | 0.0000         |

Table S2. Observed age-specific high-risk HPV prevalence in Spain used in the example.

| Age group | CC Incidence |
|-----------|--------------|
| 10-14     | 0.000        |
| 15-19     | 0.000        |
| 20-24     | 0.000        |
| 25-29     | 3.128        |
| 30-34     | 10.400       |
| 35-39     | 23.876       |
| 40-44     | 33.084       |
| 45-49     | 38.568       |
| 50-54     | 35.160       |
| 55-59     | 31.980       |
| 60-64     | 25.824       |
| 65-69     | 18.396       |
| 70-74     | 25.304       |
| 75-79     | 18.178       |
| 80-84     | 13.344       |

Table S3. Observed age-specific cervical cancer incidence in Spain used in the example.

| Strategy           | Description                                                                                                                                                                                                                                                              | Direct Medical cost | Direct non-medical cost |
|--------------------|--------------------------------------------------------------------------------------------------------------------------------------------------------------------------------------------------------------------------------------------------------------------------|---------------------|-------------------------|
| <b>Vaccination</b> | Cost of vaccination and administration fees per dose                                                                                                                                                                                                                     | 35.00€              | 0.00€                   |
| <b>Cytology</b>    | Cost of cytology collection kit, staff, disposable supplies, laboratory transport, equipment, other supplies, facilities, patient transport, and cost of patient time                                                                                                    | 58.30€              | 17.70€                  |
| <b>HPV test</b>    | Cost of HPV collection kit, staff, disposable supplies, laboratory transport, equipment, other supplies, facilities, patient transport, and cost of patient time                                                                                                         | 65.30€              | 17.70€                  |
| <b>CIN 1</b>       | This is a weighted average of the cost of follow-up and cytology if negative result or biopsy if positive result with cytology after 6 and 12 months or follow-up with colposcopy and cytology if negative result or biopsy if positive result                           | 256.50€             | 79.50€                  |
| <b>CIN 2-3</b>     | Cost of treating a person who has true CIN2-3. This includes the treatment-specific staff time, supplies, equipment, hospitalization and follow-up visits and procedures as well as patient time receiving services, hospitalization and follow-up and patient transport | 1,492.40€           | 189.60€                 |
| <b>FIGO I</b>      | Cost of staging and treatment for stage 1 cancer (local cancer). This includes patient time for follow-up visits, hospitalization, patient transport, complementary procedures (pap or colposcopy)                                                                       | 5,521.00€           | 214.00€                 |
| <b>FIGO II</b>     | Cost of staging and treatment for stage 2 cancer (regional cancer). This includes patient time for follow-                                                                                                                                                               | 12,362.00€          | 214.00€                 |

|                 |                                                                                                                                                                                                                                                                                                     |            |         |
|-----------------|-----------------------------------------------------------------------------------------------------------------------------------------------------------------------------------------------------------------------------------------------------------------------------------------------------|------------|---------|
| <b>FIGO III</b> | up visits, hospitalization, patient transport, complementary procedures (pap or colposcopy)<br>Cost of staging and treatment for stage 3 cancer (distant cancer). This includes patient time for follow-up visits, hospitalization, patient transport, complementary procedures (pap or colposcopy) | 22,998.00€ | 214.00€ |
| <b>FIGO IV</b>  | Cost of staging and treatment for stage 4 cancer. This includes patient time for follow-up visits, hospitalization, patient transport, complementary procedures (pap or colposcopy)                                                                                                                 | 33,830.00€ | 214.00€ |

Table S4. Unitary cost per woman of vaccination, screening tests, follow-up or treatment of premalignant lesions, and treatment of cervical cancer stages (costs indexed at year 2013) used in the example.

SUPPLEMENTARY MATERIAL: Online Cost-Effectiveness Analysis (OCEAN): A user-friendly interface to conduct cost-effectiveness analyses.

| Strategy                                   | Undiscounted.Mean                          | Undiscounted.P2.5  | Undiscounted.P97.5 | Discounted.3..Mean | Discounted.3..P2.5 | Discounted.3..P97.5 | V1                            |                        |
|--------------------------------------------|--------------------------------------------|--------------------|--------------------|--------------------|--------------------|---------------------|-------------------------------|------------------------|
| No intervention                            | Life expectancy                            | 73.8935000         | 73.8868000         | 73.8988700         | 52.5990800         | 52.5943100          | 52.6029000                    |                        |
|                                            | Total QALYs per strategy                   | 6,971,271.0000000  | 6,964,514.0000000  | 6,983,007.0000000  | 2,971,538.0000000  | 2,970,482.0000000   | 2,972,886.0000000             |                        |
|                                            | Total QALYs per person                     | 69.7127100         | 69.6451400         | 69.8300700         | 29.7153800         | 29.7048200          | 29.7288600                    |                        |
|                                            | Total medical cost per strategy            | 30,188,570.0000000 | 28,273,540.0000000 | 32,282,090.0000000 | 8,244,841.0000000  | 7,750,185.0000000   | 8,724,526.0000000             |                        |
|                                            | Total medical cost per person              | 301.8857000        | 282.7354000        | 322.8209000        | 82.4484100         | 77.5018500          | 87.2452600                    |                        |
|                                            | Total non medical direct cost per strategy | 330,501.6000000    | 314,562.9000000    | 351,015.6000000    | 91,795.0100000     | 87,511.4000000      | 96,957.5500000                |                        |
|                                            | Total non medical direct cost per person   | 3.3050160          | 3.1456290          | 3.5101560          | 0.9179501          | 0.8751140           | 0.9695755                     |                        |
|                                            | Total indirect cost per strategy           | 0.0000000          | 0.0000000          | 0.0000000          | 0.0000000          | 0.0000000           | 0.0000000                     |                        |
|                                            | Total indirect cost per person             | 0.0000000          | 0.0000000          | 0.0000000          | 0.0000000          | 0.0000000           | 0.0000000                     |                        |
|                                            | Total cost per strategy                    | 30,519,070.0000000 | 28,588,100.0000000 | 32,633,110.0000000 | 8,336,636.0000000  | 7,837,904.0000000   | 8,820,220.0000000             |                        |
|                                            | Total cost per person                      | 305.1907000        | 285.8810000        | 326.3311000        | 83.3663600         | 78.3790400          | 88.2022000                    |                        |
|                                            | Parameter1                                 |                    |                    |                    |                    |                     |                               | Discount: 3            |
|                                            | Parameter2                                 |                    |                    |                    |                    |                     |                               | Uncertainty: 5         |
|                                            | Vaccination                                | Life expectancy    | 73.9378200         | 73.9351800         | 73.9395600         | 52.6306300          | 52.6287500                    | 52.6318700             |
| Total QALYs per strategy                   |                                            | 6,977,224.0000000  | 6,970,367.0000000  | 6,988,613.0000000  | 2,974,005.0000000  | 2,972,937.0000000   | 2,975,270.0000000             |                        |
| Total QALYs per person                     |                                            | 69.7722400         | 69.7036700         | 69.8861300         | 29.7400500         | 29.7293700          | 29.7527000                    |                        |
| Total medical cost per strategy            |                                            | 24,474,190.0000000 | 23,344,200.0000000 | 25,249,650.0000000 | 12,092,050.0000000 | 11,763,050.0000000  | 12,246,000.0000000            |                        |
| Total medical cost per person              |                                            | 244.7419000        | 233.4420000        | 252.4965000        | 120.9205000        | 117.6305000         | 122.4600000                   |                        |
| Total non medical direct cost per strategy |                                            | 186,282.7000000    | 174,722.4000000    | 195,159.4000000    | 52,340.1900000     | 49,011.7200000      | 54,345.3000000                |                        |
| Total non medical direct cost per person   |                                            | 1.8628270          | 1.7472240          | 1.9515940          | 0.5234019          | 0.4901172           | 0.5434530                     |                        |
| Total indirect cost per strategy           |                                            | 0.0000000          | 0.0000000          | 0.0000000          | 0.0000000          | 0.0000000           | 0.0000000                     |                        |
| Total indirect cost per person             |                                            | 0.0000000          | 0.0000000          | 0.0000000          | 0.0000000          | 0.0000000           | 0.0000000                     |                        |
| Total cost per strategy                    |                                            | 24,660,470.0000000 | 23,518,930.0000000 | 25,444,810.0000000 | 12,144,390.0000000 | 11,812,060.0000000  | 12,300,330.0000000            |                        |
| Total cost per person                      |                                            | 246.6047000        | 235.1893000        | 254.4481000        | 121.4439000        | 118.1206000         | 123.0033000                   |                        |
| Parameter1                                 |                                            |                    |                    |                    |                    |                     |                               | Vaccination            |
| Parameter2                                 |                                            |                    |                    |                    |                    |                     |                               | Efficacy: 0.7          |
| Parameter3                                 |                                            |                    |                    |                    |                    |                     |                               | Vaccine Type: Bivalent |
| Parameter4                                 |                                            |                    |                    |                    |                    |                     | N Dosis: 3                    |                        |
| Parameter5                                 |                                            |                    |                    |                    |                    |                     | Coverage: 0.7                 |                        |
| Parameter6                                 |                                            |                    |                    |                    |                    |                     | Discount: 3                   |                        |
| Parameter7                                 |                                            |                    |                    |                    |                    |                     | Uncertainty: 5                |                        |
| 5y-HPV DNA test                            | Life expectancy                            | 73.95647           | 73.95477           | 73.95947           | 52.64390           | 52.64269            | 52.64604                      |                        |
|                                            | Total QALYs per strategy                   | 6,980,286.0000000  | 6,973,093.0000000  | 6,991,434.0000000  | 2,973,872.0000000  | 2,972,759.0000000   | 2,975,141.0000000             |                        |
|                                            | Total QALYs per person                     | 69.80286           | 69.73093           | 69.91434           | 29.73872           | 29.72759            | 29.75141                      |                        |
|                                            | Total medical cost per strategy            | 58,892,260.0000000 | 58,540,080.0000000 | 59,641,860.0000000 | 21,386,910.0000000 | 21,136,330.0000000  | 21,693,660.0000000            |                        |
|                                            | Total medical cost per person              | 588.92260          | 585.40080          | 596.41860          | 213.86910          | 211.36330           | 216.93660                     |                        |
|                                            | Total non medical direct cost per strategy | 10,608,790.0000000 | 10,568,520.0000000 | 10,651,030.0000000 | 4,239,393.0000000  | 4,222,519.0000000   | 4,256,680.0000000             |                        |
|                                            | Total non medical direct cost per person   | 106.08790          | 105.68520          | 106.51030          | 42.39393           | 42.22519            | 42.56680                      |                        |
|                                            | Total indirect cost per strategy           | 0.0000000          | 0.0000000          | 0.0000000          | 0.0000000          | 0.0000000           | 0.0000000                     |                        |
|                                            | Total indirect cost per person             | 0.0000000          | 0.0000000          | 0.0000000          | 0.0000000          | 0.0000000           | 0.0000000                     |                        |
|                                            | Total cost per strategy                    | 69,501,040.0000000 | 69,137,950.0000000 | 70,287,800.0000000 | 25,626,300.0000000 | 25,367,370.0000000  | 25,948,070.0000000            |                        |
|                                            | Total cost per person                      | 695.01040          | 691.37950          | 702.87800          | 256.26300          | 253.67370           | 259.48070                     |                        |
|                                            | Parameter1                                 |                    |                    |                    |                    |                     |                               | Screening              |
|                                            | Parameter2                                 |                    |                    |                    |                    |                     |                               | Organized Screening    |
|                                            | Parameter3                                 |                    |                    |                    |                    |                     |                               | Screening Period: 5    |
| Parameter4                                 |                                            |                    |                    |                    |                    |                     | DNA-HPV Screening             |                        |
| Parameter5                                 |                                            |                    |                    |                    |                    |                     | DNA-HPV Screening Min Age: 30 |                        |
| Parameter6                                 |                                            |                    |                    |                    |                    |                     | DNA-HPV Screening Max Age: 65 |                        |
| Parameter7                                 |                                            |                    |                    |                    |                    |                     | Discount: 3                   |                        |
| Parameter8                                 |                                            |                    |                    |                    |                    |                     | Uncertainty: 5                |                        |
| Vaccination + 5y-HPV DNA test              | Life expectancy                            | 73.97390           | 73.97206           | 73.97548           | 52.65631           | 52.65500            | 52.65744                      |                        |
|                                            | Total QALYs per strategy                   | 6,983,064.0000000  | 6,975,425.0000000  | 6,994,832.0000000  | 2,975,360.0000000  | 2,974,196.0000000   | 2,976,781.0000000             |                        |
|                                            | Total QALYs per person                     | 69.83064           | 69.75425           | 69.94832           | 29.75360           | 29.74196            | 29.76781                      |                        |
|                                            | Total medical cost per strategy            | 55,554,060.0000000 | 54,900,760.0000000 | 56,137,790.0000000 | 25,603,770.0000000 | 25,437,460.0000000  | 25,759,170.0000000            |                        |
|                                            | Total medical cost per person              | 555.54060          | 549.00760          | 561.37790          | 256.03770          | 254.37460           | 257.59170                     |                        |
|                                            | Total non medical direct cost per strategy | 10,230,790.0000000 | 10,194,610.0000000 | 10,252,890.0000000 | 4,120,284.0000000  | 4,106,096.0000000   | 4,128,554.0000000             |                        |
|                                            | Total non medical direct cost per person   | 102.30790          | 101.94610          | 102.52890          | 41.20284           | 41.06096            | 41.28554                      |                        |
|                                            | Total indirect cost per strategy           | 0.0000000          | 0.0000000          | 0.0000000          | 0.0000000          | 0.0000000           | 0.0000000                     |                        |
|                                            | Total indirect cost per person             | 0.0000000          | 0.0000000          | 0.0000000          | 0.0000000          | 0.0000000           | 0.0000000                     |                        |
|                                            | Total cost per strategy                    | 65,784,860.0000000 | 65,096,500.0000000 | 66,390,660.0000000 | 29,724,050.0000000 | 29,544,060.0000000  | 29,887,730.0000000            |                        |
|                                            | Total cost per person                      | 657.84860          | 650.96500          | 663.90660          | 297.24050          | 295.44060           | 298.87730                     |                        |
|                                            | Parameter1                                 |                    |                    |                    |                    |                     |                               | Screening              |
|                                            | Parameter2                                 |                    |                    |                    |                    |                     |                               | Organized Screening    |
|                                            | Parameter3                                 |                    |                    |                    |                    |                     |                               | Screening Period: 5    |
| Parameter4                                 |                                            |                    |                    |                    |                    |                     | DNA-HPV Screening             |                        |
| Parameter5                                 |                                            |                    |                    |                    |                    |                     | DNA-HPV Screening Min Age: 30 |                        |
| Parameter6                                 |                                            |                    |                    |                    |                    |                     | DNA-HPV Screening Max Age: 65 |                        |
| Parameter7                                 |                                            |                    |                    |                    |                    |                     | Vaccination                   |                        |
| Parameter8                                 |                                            |                    |                    |                    |                    |                     | Efficacy: 0.7                 |                        |
| Parameter9                                 |                                            |                    |                    |                    |                    |                     | Vaccine Type: Bivalent        |                        |
| Parameter10                                |                                            |                    |                    |                    |                    |                     | N Dosis: 3                    |                        |
| Parameter11                                |                                            |                    |                    |                    |                    |                     | Coverage: 0.7                 |                        |
| Parameter12                                |                                            |                    |                    |                    |                    |                     | Discount: 3                   |                        |
| Parameter13                                |                                            |                    |                    |                    |                    |                     | Uncertainty: 5                |                        |

Table S5. Outcomes of the cost-effectiveness analyses by considered prevention strategy for the example considered.

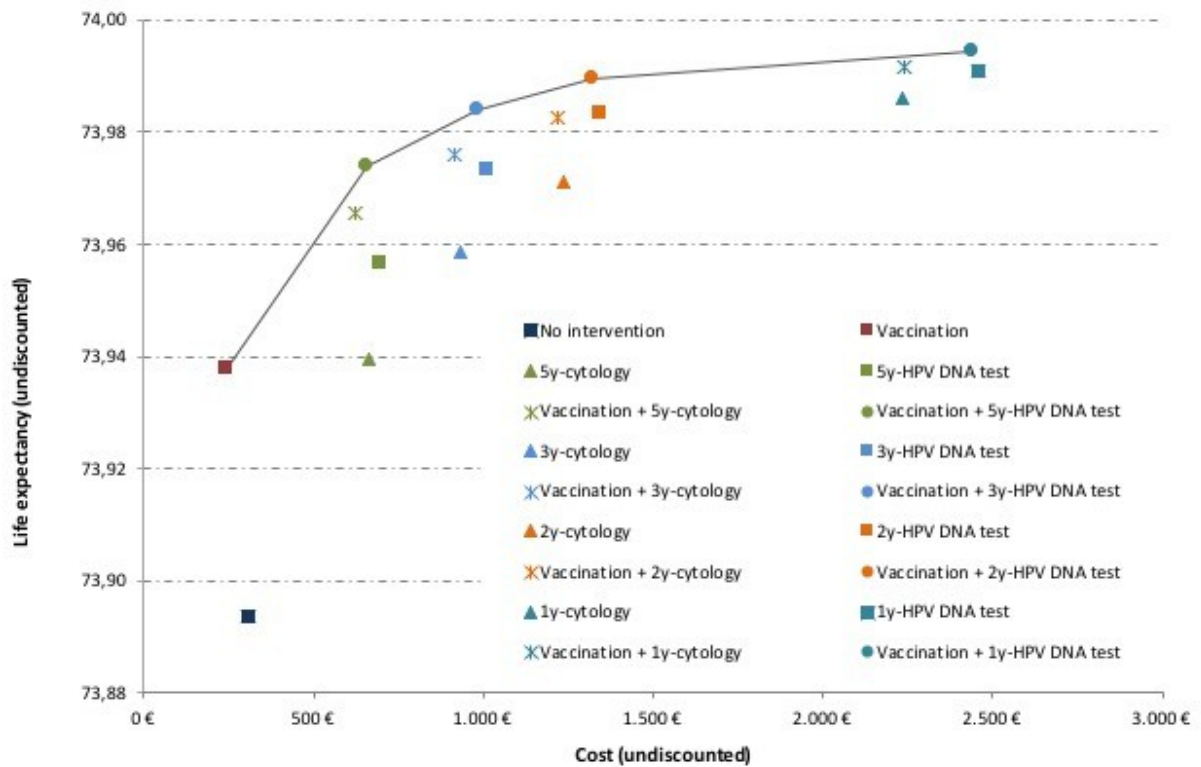

Figure S2. Cost-effectiveness frontier between undiscounted cost per person and life expectancy for the example considered. Undiscounted cost and life expectancy are drawn for all prevention strategies assessed in the described scenarios, including screening, vaccination or combined vaccination and screening.
